# Supplementary material
Source: publisher site journal article supplement (https://www.dovepress.com/article/275941)
Supplement: Supplementary file 1 [file get_supplementary_file.php]

**
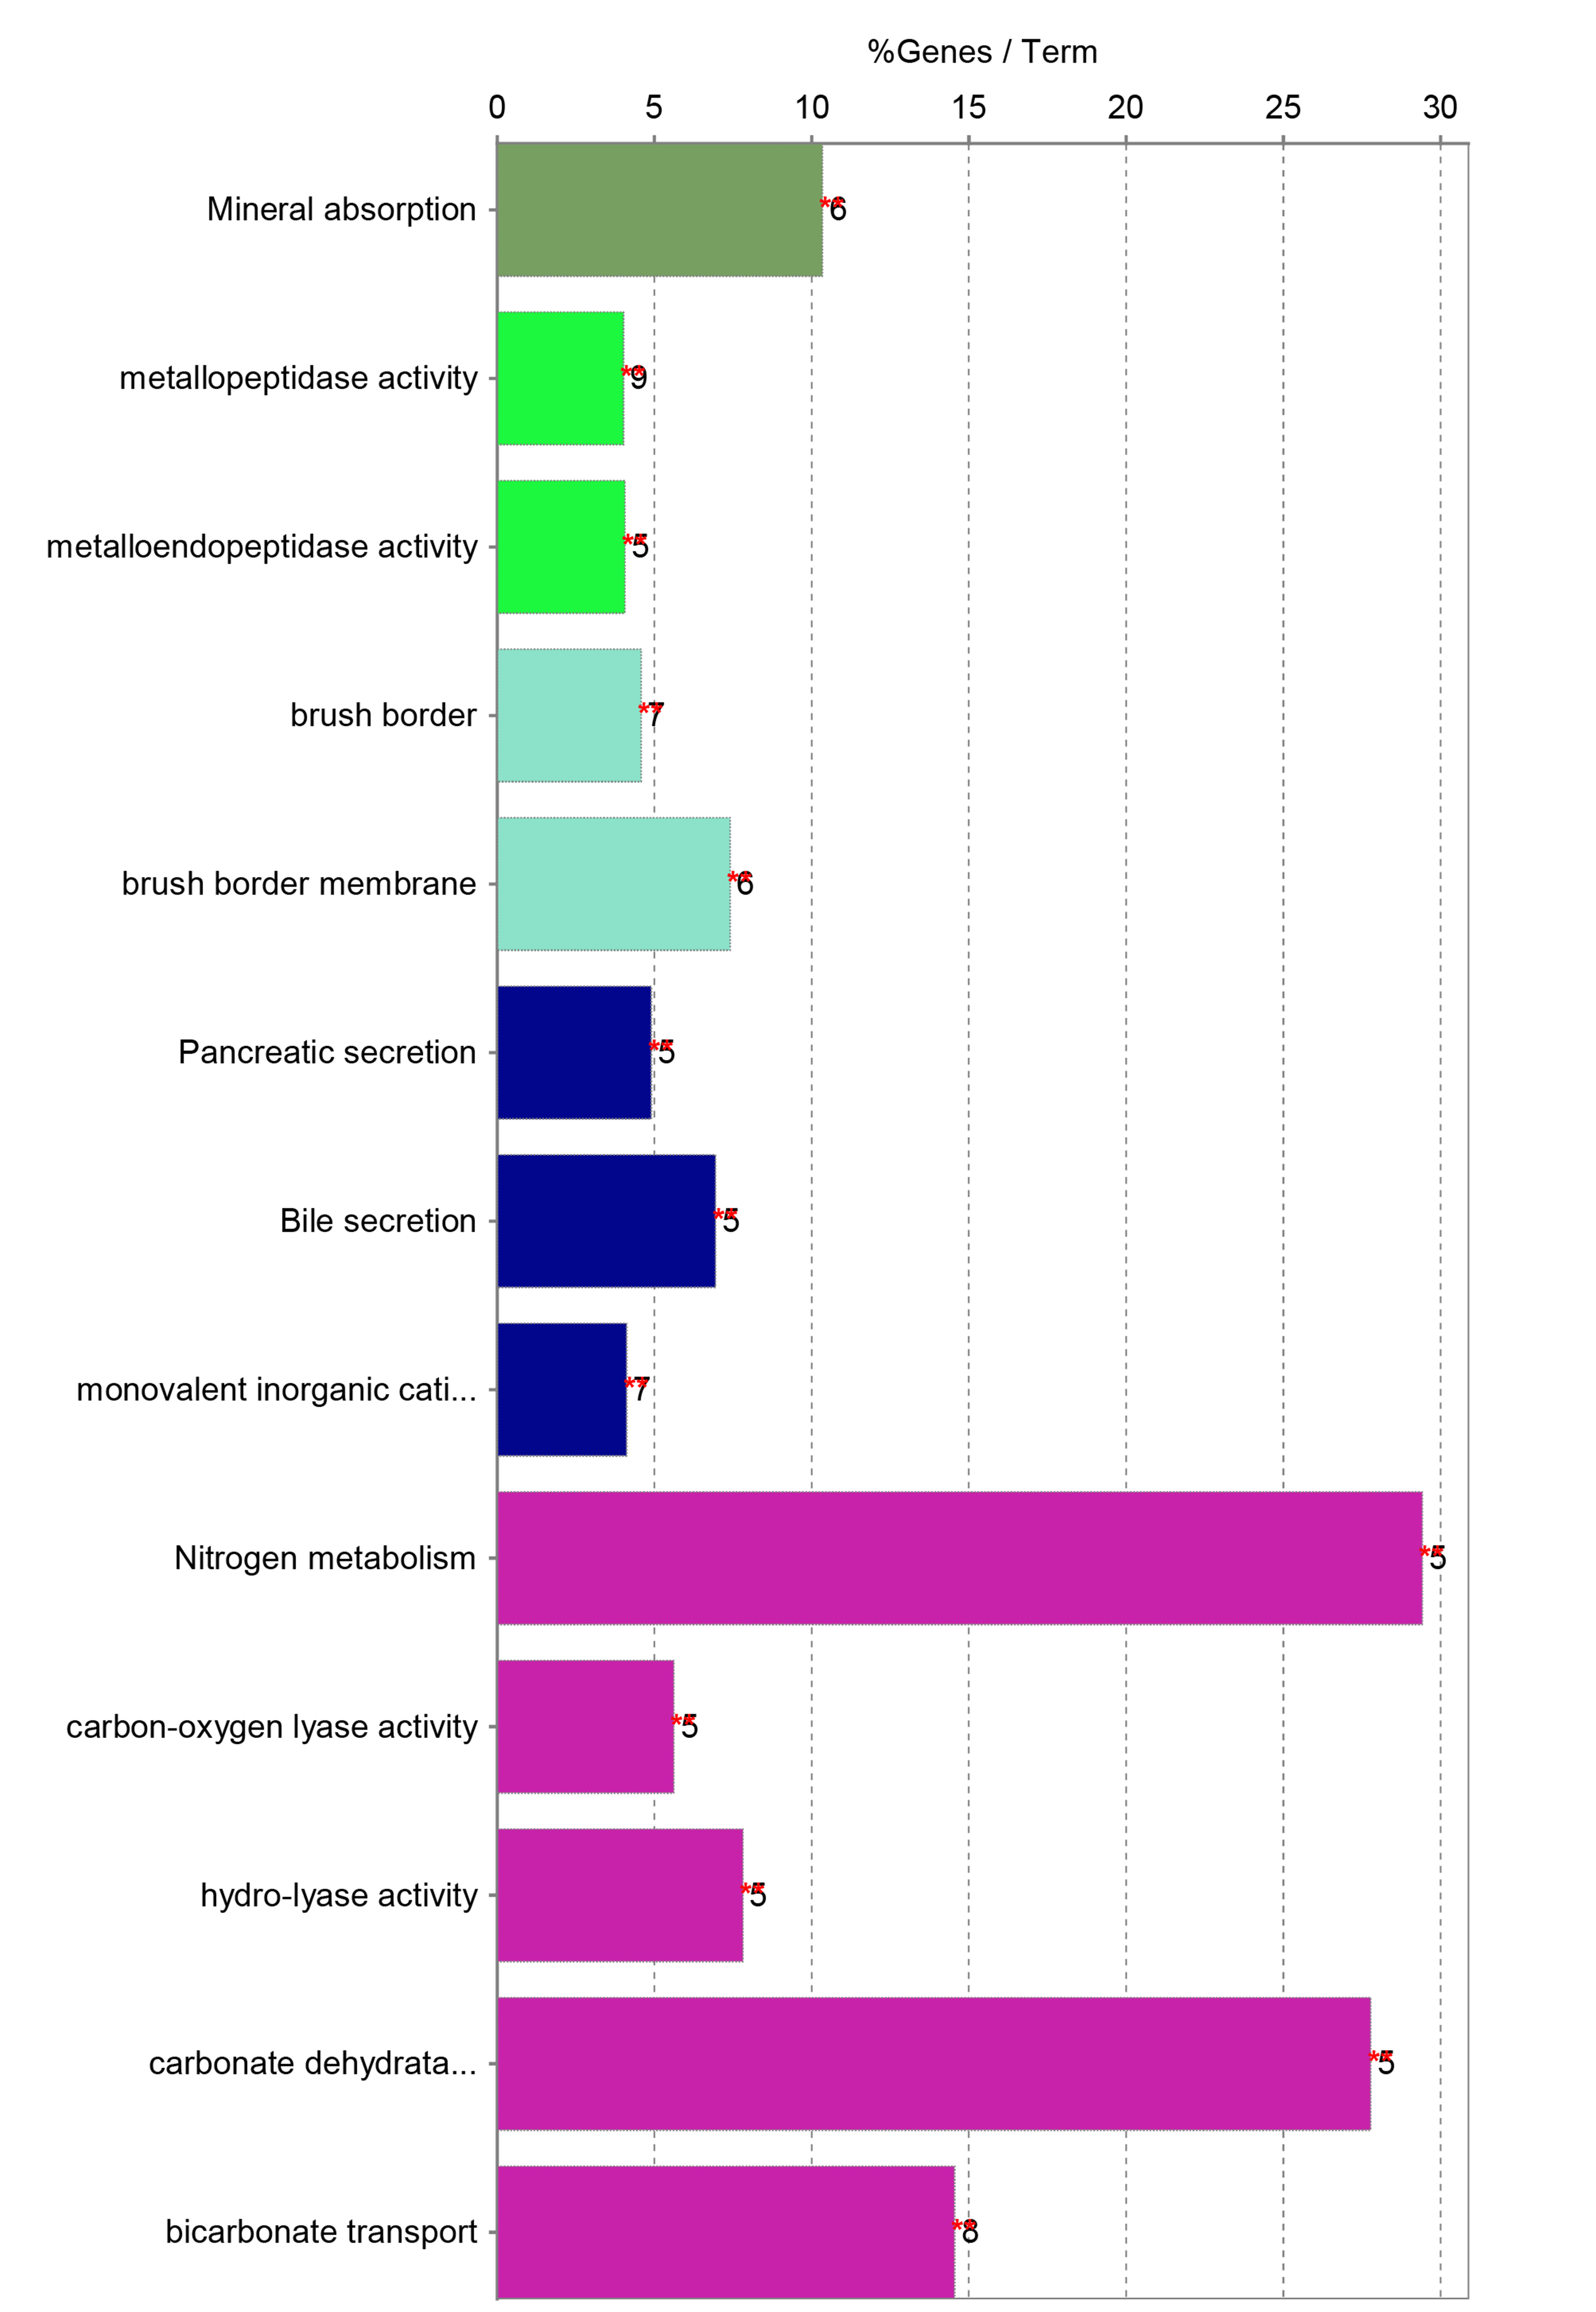
Supplemental Figure** **1** GO/KEGG pathway terms associated to overlapping DEGs. **Note:** The representative Terms and Pathways and were indicated with double asterisk.

**
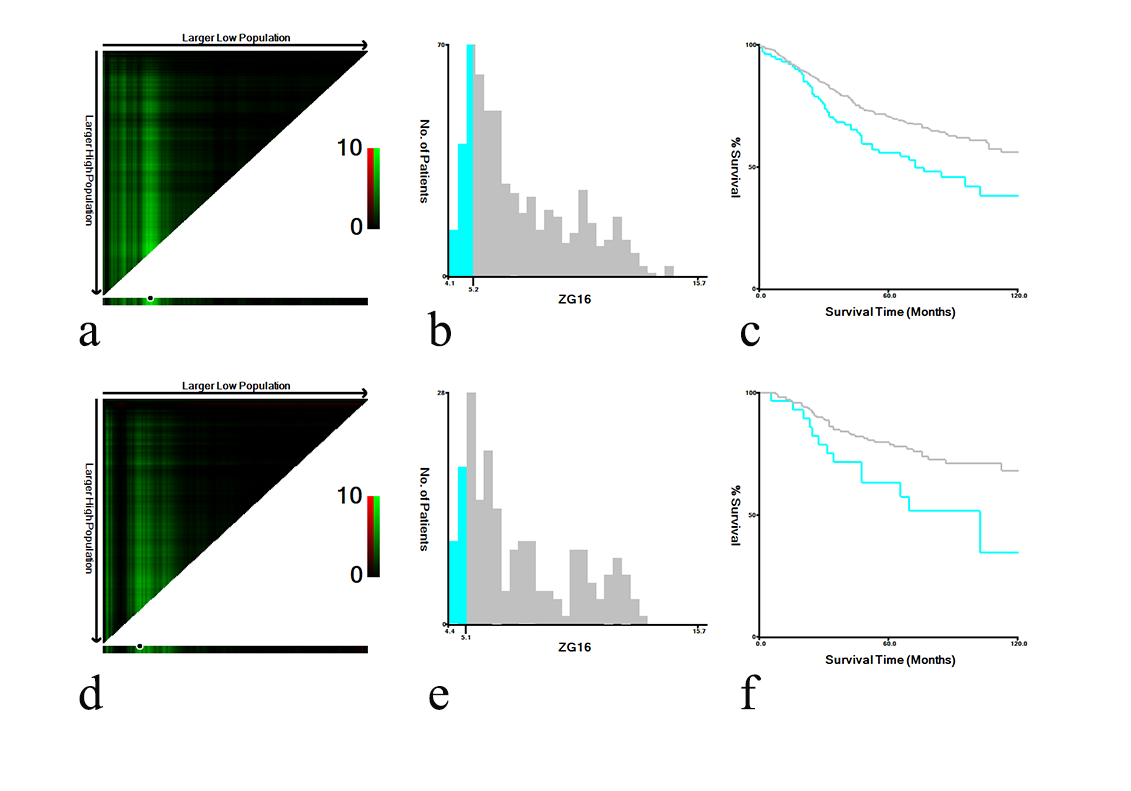
Supplemental Figure 2** The optimal cut-off value of *ZG16* of 562 I-Ⅳ CRC patients (2a, 2b, 2c) and 203 II-III patients who had been treated with chemotherapy (2d, 2e, 2f). The data are represented graphically in the bar where each point represents the data from a given set (a and d). The optimal cut-points were identified by locating the brightest pixel on the X-tile plot. The number distribution of patients was displayed on the histogram (b and e) and corresponding populations are displayed on the Kaplan-Meier curve(c and f).
